# Supplementary material for: Necessary storage for managing early flash flood to save crops in the north-eastern region of Bangladesh
Source: Copernicus journal article supplement (doi:10.5194/piahs-386-27-2024), 2024-04-19
Supplement: Supplementary file 1 [file piahs-386-27-2024-supplement.pdf]

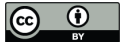

*Supplement of*

## **Necessary storage for managing early flash flood to save crops in the north-eastern region of Bangladesh**

**Muhammad Masood and Abdul Wahid Mohamed Rasmy**

*Correspondence to:* Muhammad Masood (masood35bd@yahoo.com)

The copyright of individual parts of the supplement might differ from the article licence.

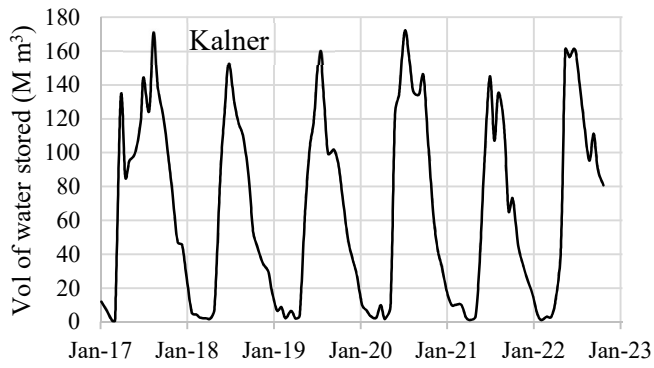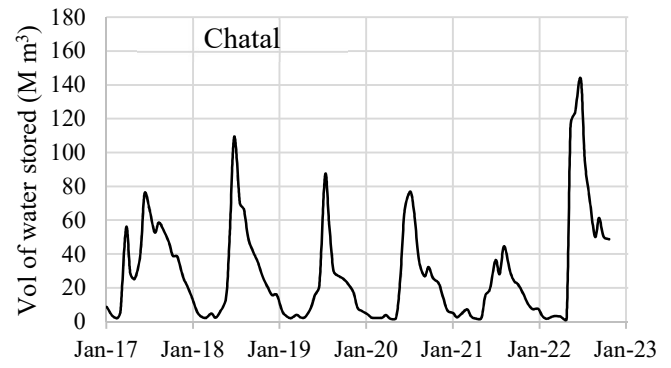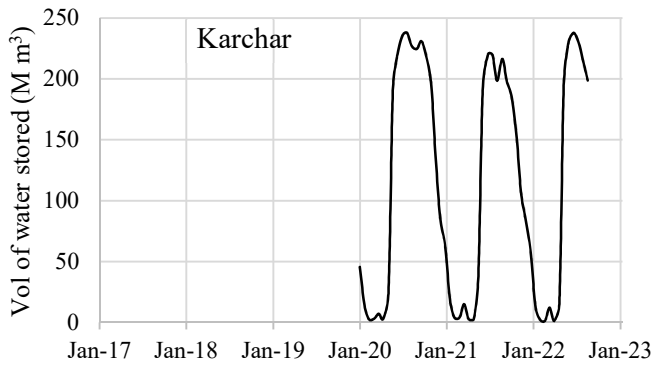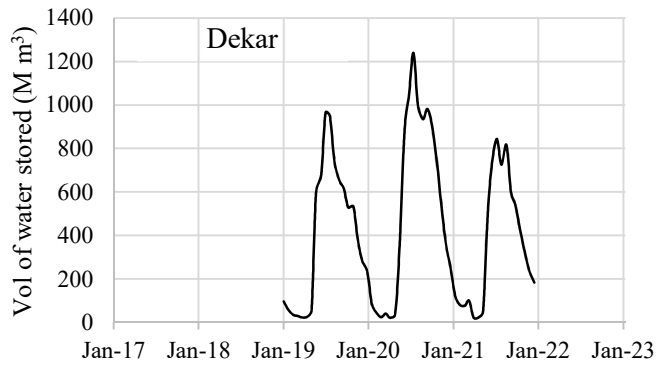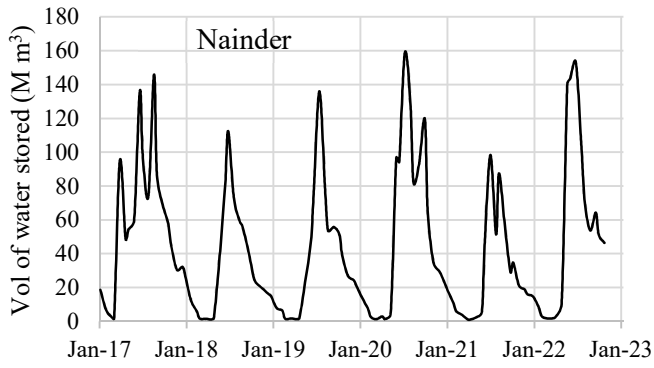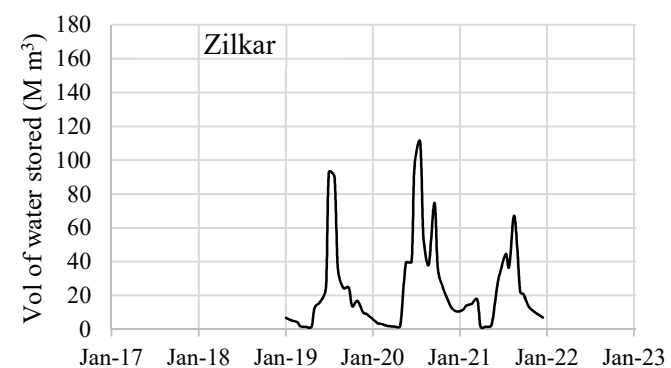

**Figure S1: Time series of water volume stored in different haors.**
